# Supplementary material for: The Effect of Irradiation with a 405 nm Blue-Violet Laser on the Bacterial Adhesion on the Osteosynthetic Biomaterials
Source: Hindawi journal article supplement (doi:10.1155/2018/2635964), 2018-11-13
Supplement: f1 [file 2635964.f1.docx]

Intensity

Wevelength (nm)
